# Supplementary material
Source: PubMed Central journal article supplement (PMC3554850)
Supplement: NIHMS411882-supplement-1_si_001.pdf [file NIHMS411882-supplement-1_si_001.pdf]

## **Supporting Information**

# Nutrient-dependent Structural Changes in *S. aureus* Peptidoglycan Revealed by Solid-State NMR Spectroscopy

*Xiaoxue Zhou and Lynette S. Cegelski\**

Department of Chemistry, Stanford University, CA 94305, United States

Email: [cegelski@stanford.edu](mailto:cegelski@stanford.edu)

**Table S1. Additional cell-wall properties at different growth stages**

| OD          | peptidoglycan yield / cell <sup>a</sup> | Incorporation of L-[ε- <sup>15</sup> N] Lys in peptidoglycan <sup>b</sup> |
|-------------|-----------------------------------------|---------------------------------------------------------------------------|
| 0.7 (3.5 h) | 16%                                     | 1.00                                                                      |
| 2.0 (5.2 h) | 18%                                     | 1.25                                                                      |
| 3.6 (8 h)   | 20%                                     | 1.48                                                                      |
| 4.0 (12 h)  | 21%                                     | 1.43                                                                      |

<sup>a</sup> Percentages of peptidoglycan (dry mass) isolated from whole cells (dry mass). <sup>b</sup> Values are from the sums and calibrated integrals of <sup>15</sup>N CPMAS spectra of L-[ε-<sup>15</sup>N]Lys-labeled peptidoglycan normalized by the dry weight of whole cells used for the isolation.

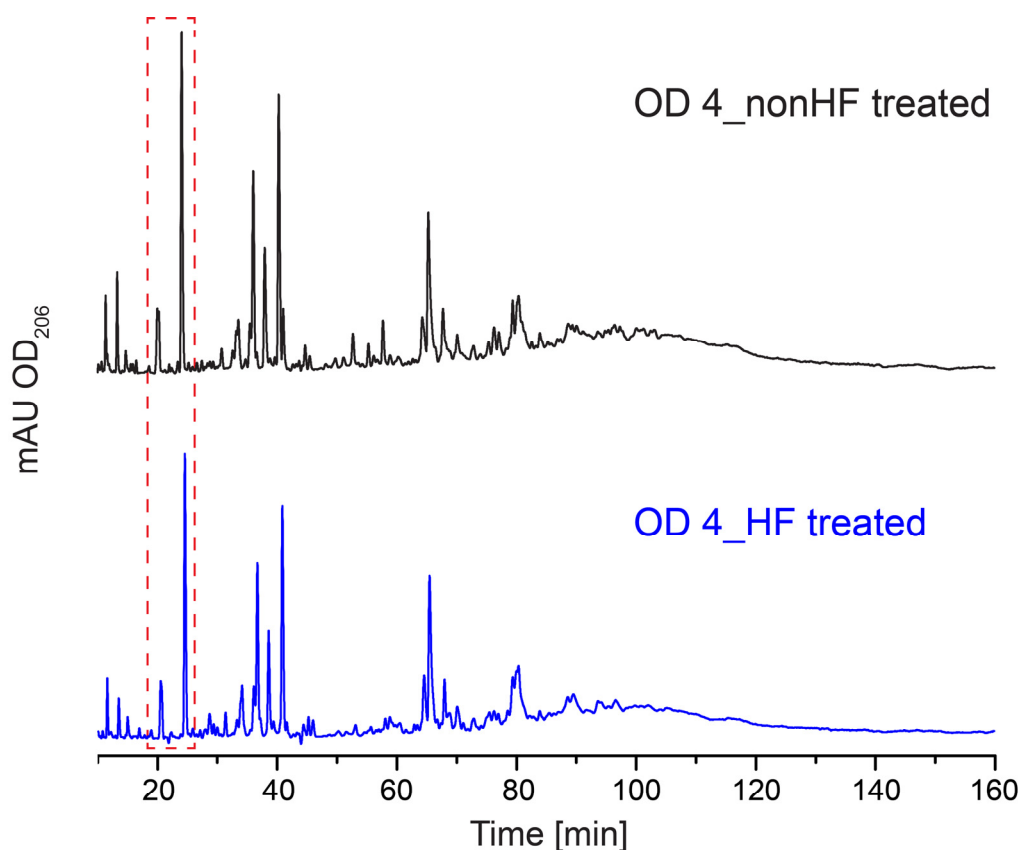

**Figure S1. Muropeptide profiles of OD 4 peptidoglycan treated with and without hydrofluoric acid.** Isolated peptidoglycan was treated with mutanolysin and resolved with reversed-phase HPLC as described in “Materials and Methods”. The major features are independent of the hydrofluoric





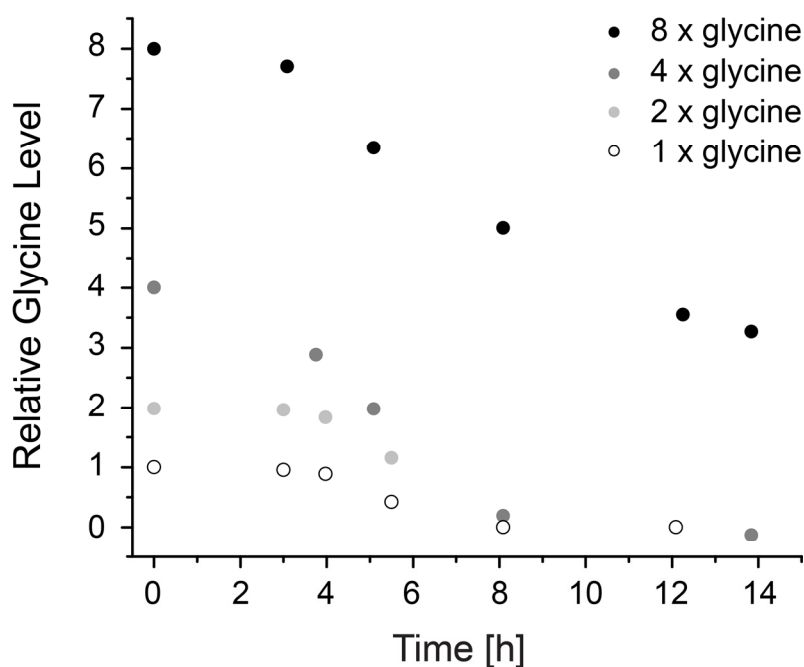

**Figure S3. Glycine level in the media supplemented with various concentration of glycine.**

Glycine levels were monitored by solution NMR using  $[2-$
